# Supplementary material for: Nickel binding to histone H4
Source: Royal Society of Chemistry journal article supplement (doi:10.1039/b916019c), 2009-11-19
Supplement: b916019c.pdf [file b916019c.pdf]

## Nickel binding to histone H4:

Maria Antonietta Zoroddu,<sup>a\*</sup> Massimiliano Peana,<sup>a</sup> Serenella Medici,<sup>a</sup> Luigi Casella,<sup>b</sup> Enrico Monzani<sup>b</sup> and Max Costa<sup>c</sup>

<sup>a\*</sup>Department of Chemistry & Pharmacy Faculty, University of Sassari, via Vienna 2, 07100 Sassari, Italy

<sup>b</sup>Department of Chemistry, University of Pavia, Italy

<sup>c</sup>Department of Environmental Medicine and Kaplan Comprehensive Cancer Center, New York University School of Medicine, New York, USA

### 1)- Dependence of the intensity of the CD bands in a high affinity single binding equilibrium

The present treatment follows a similar analysis of binding equilibrium carried out by a spectrophotometric method [1].

In the presence of a single association between histone H4 (H) and Ni<sup>2+</sup> the distribution of the species in solution is described by the binding constant and the following equations:

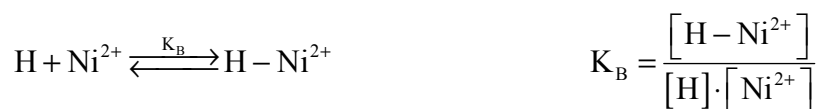

$$[\text{H}]_0 = [\text{H-Ni}^{2+}] + [\text{H}]$$

$$[\text{Ni}^{2+}]_0 = [\text{H-Ni}^{2+}] + [\text{Ni}^{2+}]$$

where [H], [Ni<sup>2+</sup>], [H-Ni<sup>2+</sup>] are the actual concentrations of free H4, nickel(II) and their complex, respectively. [H]<sub>0</sub> and [Ni<sup>2+</sup>]<sub>0</sub> are the total (free plus bound) concentrations of H4 and nickel(II). The dependence of [H-Ni<sup>2+</sup>], [H] and [Ni<sup>2+</sup>] as a function of [H]<sub>0</sub>, [Ni<sup>2+</sup>]<sub>0</sub> and K<sub>B</sub> can be obtained by solving the equations system. The variation in CD intensity depends directly on the fraction of H bound to Ni<sup>2+</sup> according to the equation:

$$\Delta I = \Delta I_\infty \times \frac{[\text{H-Ni}^{2+}]}{[\text{H}]_0}$$

Thus, at each addition of nickel(II) the total intensity is given by:

$$I = \Delta I + I_0$$

The introduction of the equation for [H-Ni<sup>2+</sup>], obtained from the equation system, gives the final equation that reports the observed absorbance variation as a function of K<sub>B</sub>, [H]<sub>0</sub>, [Ni<sup>2+</sup>]<sub>0</sub> and ΔI<sub>∞</sub>:

$$I = \frac{\Delta I_\infty}{2 \cdot [\text{Ni}^{2+}]_0 \cdot K_B} \cdot \left\{ K_B \cdot ([\text{Ni}^{2+}]_0 + [\text{H}]_0) + 1 - \sqrt{K_B^2 \cdot ([\text{Ni}^{2+}]_0 - [\text{H}]_0)^2 + 2 \cdot K_B \cdot ([\text{Ni}^{2+}]_0 + [\text{H}]_0) + 1} \right\} + I_0$$

[1] E. Monzani, B. Bonafè, A. Fallarini, C. Redaelli, L. Casella, L. Minchiotti, M. Galliano.

Biochim. Biophys. Acta, 1547, 302-312 (2001).

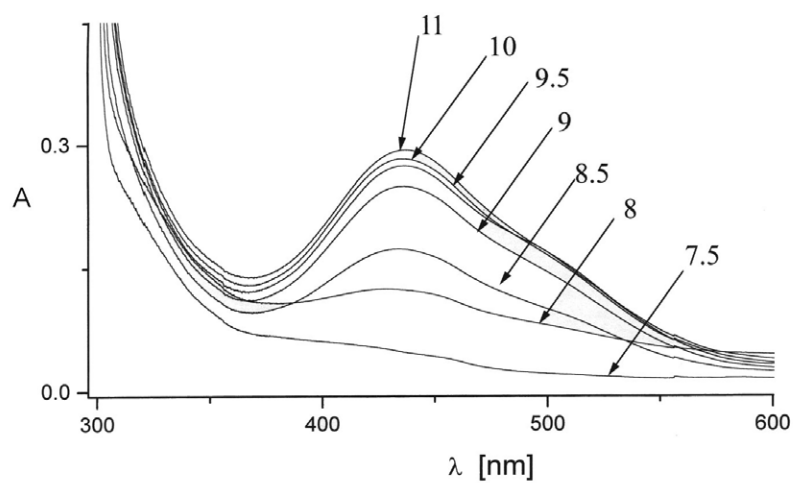

**Fig. 1S** pH dependence of the UV-Vis spectra for the complex between H4 tail and Ni<sup>II</sup> in a 1:1 molar ratio. The figures shown on the curves give the pH values.
